# Supplementary material for: Phosphazene-catalyzed ring-opening polymerization of ε-caprolactone: influence of solvents and initiators
Source: Royal Society of Chemistry journal article supplement (doi:10.1039/c4py00493k), 2014-01-01
Supplement: c4py00493k1.pdf [file c4py00493k1.pdf]

Supporting Information

## Phosphazene-Catalyzed Ring-Opening Polymerization of $\epsilon$ -Caprolactone: Influence of Solvent and Initiator

Haleema Alamri, Junpeng Zhao, David Pahovnik and Nikos Hadjichristidis\*

King Abdullah University of Science and Technology (KAUST), Physical Sciences and Engineering Division, KAUST Catalysis Center, Polymer Synthesis Laboratory, Thuwal 23955, Saudi Arabia

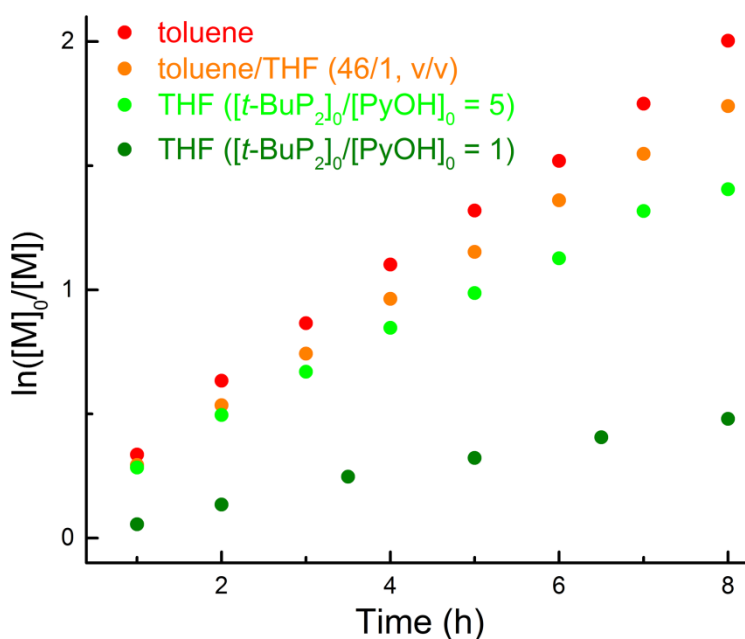

**Figure S1.** Kinetic plots for *t*-BuP<sub>2</sub>-catalyzed ROP of  $\epsilon$ -caprolactone using 1-pyrenebutanol (PyOH) as initiator in toluene or toluene/THF (46/1, v/v) where  $[t\text{-BuP}_2]_0/[\text{PyOH}]_0 = 1$  (entries 1 and 2 in Table 1), and in THF where  $[t\text{-BuP}_2]_0/[\text{PyOH}]_0 = 1$  or 5 (entries 3 and 4 in Table 1).

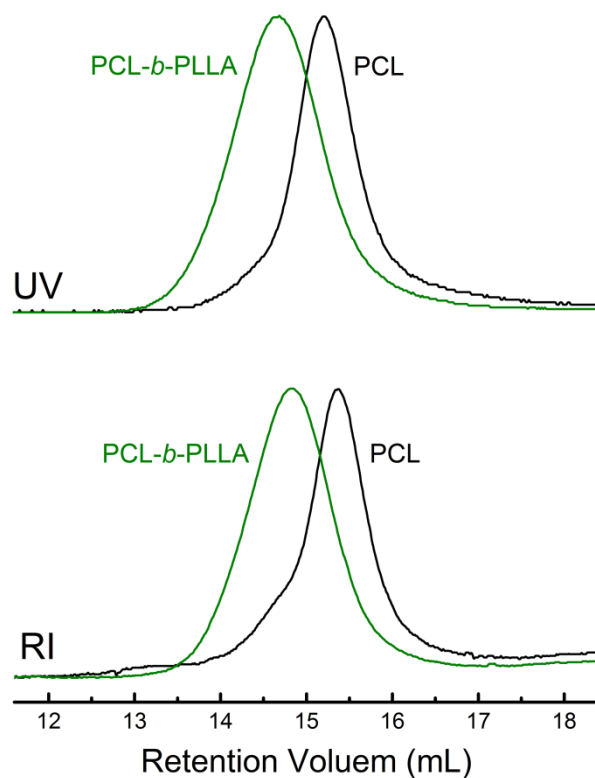

**Figure S2.** SEC traces (RI and UV signals) of a representative poly( $\epsilon$ -caprolactone) and the corresponding poly( $\epsilon$ -caprolactone)-*b*-poly(L-lactide) obtained from the *t*-BuP<sub>2</sub>-catalyzed sequential ring-opening polymerization of  $\epsilon$ -caprolactone (8 h) and L-lactide (10 min) (also see entry 1 in Table 1 and 2).

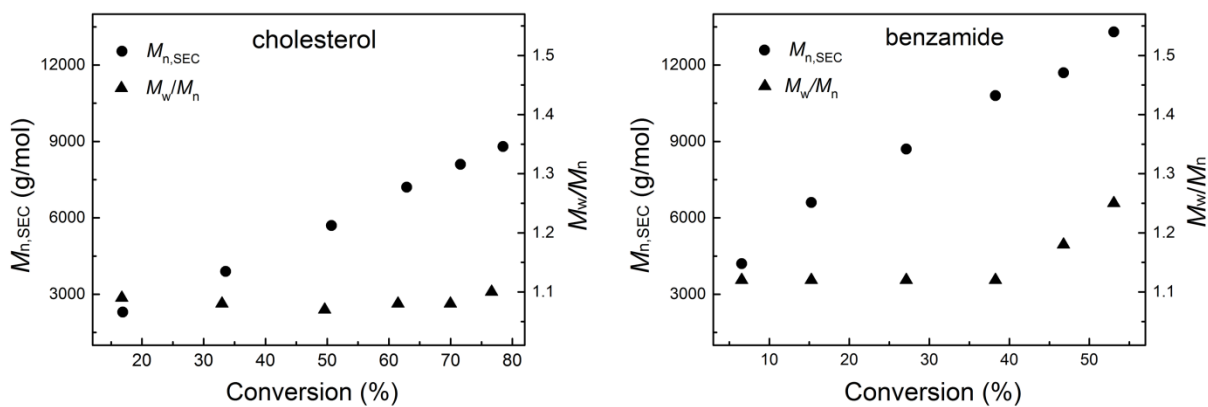

**Figure S3.** Dependence of apparent molecular weight ( $M_{n,SEC}$ ) and dispersity ( $M_w/M_n$ ) of poly( $\epsilon$ -caprolactone) on monomer conversion during the *t*-BuP<sub>2</sub>-catalysed ring-opening polymerization of  $\epsilon$ -caprolactone using cholesterol or benzamide as initiator (entries 10 and 13 in Table 1).

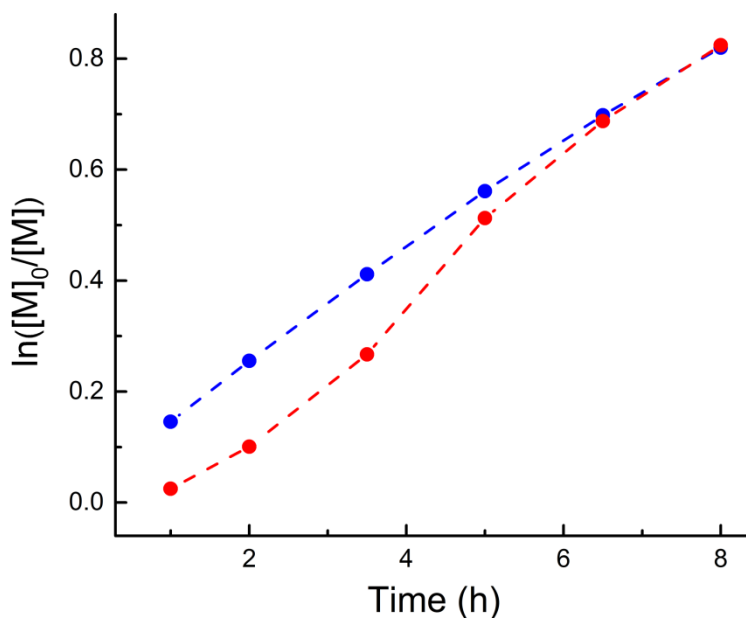

**Figure S4.** Kinetic plots of *t*-BuP<sub>2</sub>-catalysed ring-opening polymerization of  $\epsilon$ -caprolactone using a poly(ethylene glycol) monomethyl ether (blue) and a poly(propylene glycol) monobutyl ether (red) as initiators (entries 11 and 12 in Table1).

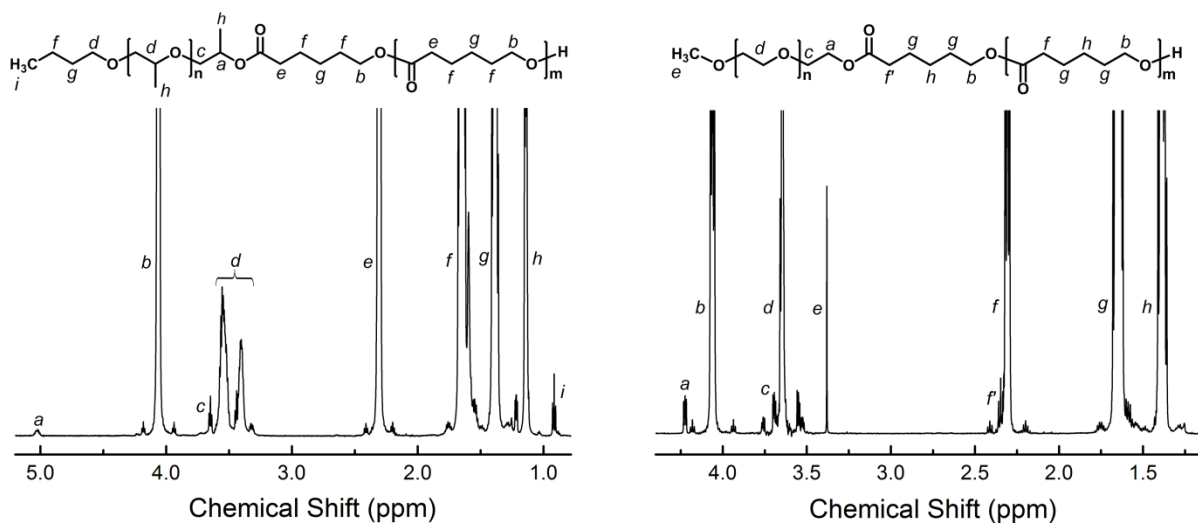

**Figure S5.** <sup>1</sup>H NMR spectra of the isolated products of poly(propylene glycol)-*b*-poly( $\epsilon$ -caprolactone) (left) and poly(ethylene glycol)-*b*-poly( $\epsilon$ -caprolactone) (right) prepared by *t*-BuP<sub>2</sub>-catalysed ring-opening polymerization of  $\epsilon$ -caprolactone from the corresponding macro-initiators (entries 11 and 12 in Table1).
